# Supplementary material for: No detectable influence of the carbonate ion effect on changes in stable carbon isotope ratios ( δ 13 C) of shallow dwelling planktic foraminifera over the past 160 kyr
Source: Copernicus journal article supplement (doi:10.5194/cp-20-991-2024), 2024-04-25
Supplement: Supplementary file 1 [file cp-20-991-2024-supplement.zip]

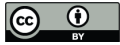

## *Supplement of*

# **No detectable influence of the carbonate ion effect on changes in stable carbon isotope ratios ( $\delta^{13}\text{C}$ ) of shallow dwelling planktic foraminifera over the past 160 kyr**

**Peter Köhler and Stefan Mulitza**

*Correspondence to:* Peter Köhler ([peter.koehler@awi.de](mailto:peter.koehler@awi.de))

- [cp-20-991-2024-supplement-title-page.pdf](#)
- [Table\\_S1.xlsx](#)
- [mySI\\_cie\\_gruber\\_gsacc\\_\\_150kyr\\_revision\\_corrected.pdf](#)

The copyright of individual parts of the supplement might differ from the article licence.
