# Supplementary material for: No detectable influence of the carbonate ion effect on changes in stable carbon isotope ratios ( δ 13 C) of shallow dwelling planktic foraminifera over the past 160 kyr
Source: Copernicus journal article supplement (doi:10.5194/cp-20-991-2024), 2024-04-25
Supplement: Supplementary file 1 [file Table_S1.xlsx]

## Sheet: README
Title	No detectable influence of the carbonate ion effect on changes in stable carbon isotope ratios (δ13C) of shallow dwelling planktic foraminifera over the past 160 kyr
Authors	Peter Köhler and Stefan Mulitza
	submitted to “Climate of the Past”
Table S1	Supplementary Table including meta data of the records contributing to our stacks
Contains	- subtable “Meta data for G. ruber”
	- subtable “Meta data for T. sacculifer”. Here the original species names (Globigerinoides sacculifer) has been used
	Each subtable consists of the following columns:
Core	ID of the sediment core
Longitude	of core location in °E
Latitude	of core location in °N
Water Depth	of core location in m
Age Min	Age of the youngest contribution from this core in ka
Age Max	Age of the oldest contribution from this core in ka
O-Corr	d18O value in permil from 21-19 ka for which this core has been correction in D(d18O)
C-Corr	d13C value in permil from 21-19 ka for which this core has been correction in D(d13C)
Species	Name of sampled species
Reference	Reference of original publications
Source	Data source, which, if empty, is for most the World Atlas of late Quaternary Foraminiferal Oxygen and Carbon Isotope Ratios (WA_Foraminiferal_Isotopes_2022), PANGAEA, https://doi.org/10.1594/PANGAEA.936747
Original references of the data contributing to our stacks (cited in subtables with the Meta Data)
Adegbie, A., Schneider, R., Röhl, U., and Wefer, G.: Glacial millennial-scale fluctuations in central African precipitation recorded in ter- rigenous sediment supply and freshwater signals offshore Cameroon, Palaeogeography, Palaeoclimatology, Palaeoecology, 197, 323–333, https://doi.org/10.1016/S0031-0182(03)00474-7, 2003.
Adegbie, A. T.: Reconstruction of paleoenvironmental conditions in Equatorial Atlantic and the Gulf of Guinea Basins for the last 245.000 years., PhD thesis, Berichte aus dem Fachbereich Geowissenschaften der Universität Bremen, 178, 113 pp., 2001.
Andres, M. S.: Late quaternary paleoceanography of the Great Australian Bight: A geochemical and sedimentological study of cool-water carbonates, ODP Leg 182, Site 1127, PhD thesis, Swiss Federal Institute of Technology Zurich, Switzerland, 2002.
Arz, H. W., Pätzold, J., and Wefer, G.: Correlated Millennial-Scale Changes in Surface Hydrography and Terrigenous Sediment Yield Inferred from Last-Glacial Marine Deposits off Northeastern Brazil, Quaternary Research, 50, 157–166, https://doi.org/10.1006/qres.1998.1992, 1998.
Arz, H. W., Pätzold, J., and Wefer, G.: The deglacial history of the western tropical Atlantic as inferred from high resolution stable isotope records off northeastern Brazil, Earth and Planetary Science Letters, 167, 105–117, https://doi.org/10.1016/S0012-821X(99)00025-4, 1999a.
Arz, H. W., Pätzold, J., and Wefer, G.: Climatic changes during the last deglaciation recorded in sediment cores from the northeastern Brazilian Continental Margin, Geo-Marine Letters, 19, 209–218, https://doi.org/10.1007/s003670050111, 1999b.
Ausin, B., Haghipour, N., Wacker, L., Voelker, A. H. L., Hodell, D., Magill, C., Looser, N., Bernasconi, S. M., and Eglinton, T. I.: Radiocarbon Age Offsets Between Two Surface Dwelling Planktonic Foraminifera Species During Abrupt Climate Events in the SW Iberian Margin, Paleoceanography and Paleoclimatology, 34, 63–78, https://doi.org/10.1029/2018PA003490, 2019.
Bostock, H. C., Opdyke, B. N., Gagan, M. K., and Fifield, L. K.: Carbon isotope evidence for changes in Antarctic Intermediate Water circula- tion and ocean ventilation in the southwest Pacific during the last glaciation, Paleoceanography, 19, PA4013, doi: 10.1029/2004PA001 047, 2004.
Chen, M.-T., Shiau, L.-J., Yu, P.-S., Chiu, T.-C., Chen, Y.-G., and Wei, K.-Y.: 500 000-Year records of carbonate, organic carbon, and foraminiferal sea-surface temperature from the southeastern South China Sea (near Palawan Island), Palaeogeography, Palaeoclimatology, Palaeoecology, 197, 113–131, https://doi.org/10.1016/S0031-0182(03)00389-4, 2003.
CLIMAP Project Members: Seasonal reconstructions of the earth’s surface at the last glacial maximum, Map and chart series (Geological Society of America), Geological Society of America, Boulder, Colo., 1981.
Curry, W. B. and Crowley, T. J.: The 13C of equatorial Atlantic surface waters: implications for ice age pCO2 levels, Paleoceanography, 2, 489–517, https://doi.org/10.1029/PA002i005p00489, 1987.
Curry, W. B., Marchitto, T. M., Mcmanus, J. F., Oppo, D. W., and Laarkamp, K. L.: Millennial-scale Changes in Ventilation of the Ther- mocline, Intermediate, and Deep Waters of the Glacial North Atlantic, vol. 112 of Geophysical Monograph Series, pp. 59–76, American Geophysical Union (AGU), https://doi.org/10.1029/GM112p0059, 1999.
De Deckker, P., Moros, M., Perner, K., and Jansen, E.: Influence of the tropics and southern westerlies on glacial interhemispheric asymmetry, Nature Geoscience, 5, 266–269, https://doi.org/10.1038/ngeo1431, 2012.
Duplessy, J.: North Atlantic deep water circulation during the last climate cycle, Bulletin de l'Institut de Geologie du Bassin d'Aquitaine, 31, 371–391, 1982.
Duplessy, J., Bard, E., Arnold, M., Shackleton, N., Duprat, J., and Labeyrie, L.: How fast did the ocean—atmosphere system run during the last deglaciation?, Earth and Planetary Science Letters, 103, 27–40, https://doi.org/10.1016/0012-821X(91)90147-A, 1991.
Dupont, L. and Kuhlmann, H.: Glacial-interglacial vegetation change in the Zambezi catchment, Quaternary Science Reviews, 155, 127–135, https://doi.org/10.1016/j.quascirev.2016.11.019, 2017.
Dürkoop, A.: Der Brasil-Strom im Spatquartär: Rekonstruktion der oberflächennahen Hydrographie während der letzten 400 000 Jahre, PhD thesis, Berichte aus dem Fachbereich Geowissenschaften der Universität Bremen, 119, 121 pp., 1998.
Dürkoop, A., Hale, W., Mulitza, S., Pätzold, J., and Wefer, G.: Stable isotope data of sediment core GeoB1503-1, PANGAEA, [data set], https://doi.org/10.1594/PANGAEA.223482, 1997a.
Dürkoop, A., Hale, W., Mulitza, S., Pätzold, J., and Wefer, G.: Stable isotope data of sediment core GeoB2125-1, PANGAEA, [data set], https://doi.org/10.1594/PANGAEA.223488, 1997b.
Dürkoop, A., Hale, W., Mulitza, S., Pätzold, J., and Wefer, G.: Stable isotope data of sediment core GeoB2202-4, PANGAEA, [data set], https://doi.org/10.1594/PANGAEA.223489, 1997c.
Dyez, K. A., Zahn, R., and Hall, I. R.: Multicentennial Agulhas leakage variability and links to North Atlantic climate during the past 80,000 years, Paleoceanography, 29, 1238–1248, https://doi.org/10.1002/2014PA002698, 2014.
Freimüller, J.: Eine hochauflösende planktische Isotopenaufzeichnung des Heinrich Event 1 im tropischen Südamerika, Bachelor thesis, Fachbereich Geowissenschaften, Universität Bremen, 2013.
Ge, H., Li, Q., and Cheng, X.: Late Quaternary high resolution monsoon records in planktonic stable isotopes from northern South China Sea(in Chinese), Earth Sci: J China Uni Geosci, 35, 515–525, https://doi.org/10.3799/dqkx.2010.000, 2010.
Gemmeke, B.: Spätquartäre Variationen der Sauerstoffisotopen-Zusammensetztung des Oberflächenwassers im östlichen tropischen Nordat- lantik, Bachelor thesis, Fachbereich Geowissenschaften, Universität Bremen, 2010.
Gibbons, F. T., Oppo, D. W., Mohtadi, M., Rosenthal, Y., Cheng, J., Liu, Z., and Linsley, B. K.: Deglacial 18O and hydrologic variability in the tropical Pacific and Indian Oceans, Earth and Planetary Science Letters, 387, 240–251, https://doi.org/10.1016/j.epsl.2013.11.032, 2014.
Gingele, F., De Deckker, P., and Norman, M.: Late Pleistocene and Holocene climate of SE Australia reconstructed from dust and river loads deposited offshore the River Murray Mouth, Earth and Planetary Science Letters, 255, 257–272, https://doi.org/10.1016/j.epsl.2006.12.019, 2007.
Govil, P. and Divakar Naidu, P.: Variations of Indian monsoon precipitation during the last 32 kyr reflected in the surface hydrography of the Western Bay of Bengal, Quaternary Science Reviews, 30, 3871–3879, https://doi.org/10.1016/j.quascirev.2011.10.004, 2011.
Hale, W. and Pflaumann, U.: Stable isotopes on Globigerinoides ruber in sediment core GeoB2109-1, PANGAEA, [data set], https://doi.org/10.1594/PANGAEA.140002, 1999.
Holbourn, A., Kuhnt, W., Kawamura, H., Jian, Z., Grootes, P., Erlenkeuser, H., and Xu, J.: Orbitally paced paleoproductivity variations in the Timor Sea and Indonesian Throughflow variability during the last 460 kyr, Paleoceanography, 20, PA3002, https://doi.org/10.1029/2004PA001094, 2005.
Hou, A., Bahr, A., Raddatz, J., Voigt, S., Greule, M., Albuquerque, A. L., Chiessi, C. M., and Friedrich, O.: Insolation and Greenhouse Gas Forcing of the South American Monsoon System Across Three Glacial-Interglacial Cycles, Geophysical Research Letters, 47, e2020GL087 948, https://doi.org/10.1029/2020GL087948, 2020.
Ivanova, E., Schiebel, R., Singh, A. D., Schmiedl, G., Niebler, H.-S., and Hemleben, C.: Primary production in the Arabian Sea during the last 135 000 years, Palaeogeography, Palaeoclimatology, Palaeoecology, 197, 61–82, https://doi.org/10.1016/S0031-0182(03)00386-9, 2003.
Johnstone, H. J. H., Kiefer, T., Elderfield, H., and Schulz, M.: Calcite saturation, foraminiferal test mass, and Mg/Ca-based temperatures dissolution corrected using XDX—A 150 ka record from the western Indian Ocean, Geochemistry, Geophysics, Geosystems, 15, 781– 797, https://doi.org/10.1002/2013GC004994, 2014.
Keigwin, L. D.: Radiocarbon and stable isotope constraints on Last Glacial Maximum and Younger Dryas ventilation in the western North Atlantic, Paleoceanography, 19, PA4012, doi: 10.1029/2004PA001 029, 2004.
Kemle-von Mücke, S.: Oberflächenwasserstruktur und -zirkulation des Südostatlantiks im Spätquartär, PhD thesis, Berichte aus dem Fach- bereich Geowissenschaften der Universität Bremen, 55, 151 pp., 1994.
Knaack, J.: Eine neue Transferfunktion zur Rekonstruktion der Paläoproduktivität aus Gemeinschaften mariner Diatomeen, PhD thesis, Geologisch-Paläontologisches Institut und Museum, Christian-Albrechts-Universität Kiel, 119 pp., 1997.
Knaack, J.-J. and Sarnthein, M.: Stable isotopes of foraminifera of ODP Hole 108-658C, PANGAEA, [data set], https://doi.org/10.1594/ PANGAEA.227736, 2005.
Kohn, M., Steinke, S., Baumann, K.-H., Donner, B., Meggers, H., and Zonneveld, K. A.: Stable oxygen isotopes from the calcareous- walled dinoflagellate Thoracosphaera heimii as a proxy for changes in mixed layer temperatures off NW Africa during the last 45,000yr, Palaeogeography, Palaeoclimatology, Palaeoecology, 302, 311–322, https://doi.org/10.1016/j.palaeo.2011.01.019, 2011.
Koutavas, A. and Lynch-Stieglitz, J.: Glacial-interglacial dynamics of the eastern equatorial Pacific cold tongue-Intertropical Convergence Zone system reconstructed from oxygen isotope records, Paleoceanography, 18, 1089, https://doi.org/10.1029/2003PA000894, 2003.
Leech, P. J., Lynch-Stieglitz, J., and Zhang, R.: Western Pacific thermocline structure and the Pacific marine Intertropical Convergence Zone during the Last Glacial Maximum, Earth and Planetary Science Letters, 363, 133 – 143, https://doi.org/10.1016/j.epsl.2012.12.026, 2013.
Li, L., Wang, H., Li, J., Zhao, M., and Wang, P.: Changes in sea surface temperature in western South China Sea over the past 450 ka, Chinese Science Bulletin, 54, 3335–3343, https://doi.org/10.1007/s11434-009-0083-9, 2009.
Li, Q., Zheng, F., Chen, M., Xiang, R., Qiao, P., Shao, L., and Cheng, X.: Glacial Paleoceanography off the Mouth of the Mekong River, Southern South China Sea, During the last 500 ka, Quaternary Research, 73, 563–572, https://doi.org/10.1016/j.yqres.2010.03.003, 2010.
Linsley, B. K.: Oxygen-isotope record of sea level and climate variations in the Sulu Sea over the past 150,000 years, Nature, 380, 234–237, https://doi.org/10.1038/380234a0, 1996.
Lo, L., Chang, S.-P., Wei, K.-Y., Lee, S.-Y., Ou, T.-H., Chen, Y.-C., Chuang, C.-K., Mii, H.-S., Burr, G. S., Chen, M.-T., Tung, Y.-H., Tsai, M.-C., Hodell, D. A., and Shen, C.-C.: Nonlinear climatic sensitivity to greenhouse gases over past 4 glacial/interglacial cycles, Scientific Reports, 7, 4626, https://doi.org/10.1038/s41598-017-04031-x, 2017.
Lynch-Stieglitz, J., Polissar, P. J., Jacobel, A. W., Hovan, S. A., Pockalny, R. A., Lyle, M., Murray, R. W., Ravelo, A. C., Bova, S. C., Dunlea, A. G., Ford, H. L., Hertzberg, J. E., Wertman, C. A., Maloney, A. E., Shackford, J. K., Wejnert, K., and Xie, R. C.: Glacial-interglacial changes in central tropical Pacific surface seawater property gradients, Paleoceanography, 30, 423–438, https://doi…
Meinecke, G.: Spätquartäre Oberflächenwassertemperaturen im östlichen äquatorialen Atlantik, PhD thesis, Berichte aus dem Fachbereich Geowissenschaften der Universität Bremen, 29, 181 pp., 1992.
Michael, S., Helmut, E., von Grafenstein, R., and Schroeder, C.: Stable-isotope stratigraphy for the last 750,000 years; Meteor core 13519 from the eastern equatorial Atlantic, Meteor-Forschungsergebnisse Reihe C Geologie und Geophysik, C38, 9–24, 1984.
Mohtadi, M., Lückge, A., Steinke, S., Groeneveld, J., Hebbeln, D., and Westphal, N.: Late Pleistocene surface and thermocline conditions of the eastern tropical Indian Ocean, Quaternary Science Reviews, 29, 887–896, https://doi.org/10.1016/j.quascirev.2009.12.006, 2010a.
Mohtadi, M., Steinke, S., Lückge, A., Groeneveld, J., and Hathorne, E. C.: Glacial to Holocene surface hydrography of the tropical eastern Indian Ocean, Earth and Planetary Science Letters, 292, 89–97, https://doi.org/10.1016/j.epsl.2010.01.024, 2010b.
Mohtadi, M., Oppo, D. W., Steinke, S., Stuut, J.-B. W., De Pol-Holz, R., Hebbeln, D., and Luckge, A.: Glacial to Holocene swings of the Australian-Indonesian monsoon, Nature Geoscience, 4, 540–544, https://doi.org/10.1038/ngeo1209, 2011.
Mohtadi, M., Prange, M., Oppo, D. W., De Pol-Holz, R., Merkel, U., Zhang, X., Steinke, S., and Luckge, A.: North Atlantic forcing of tropical Indian Ocean climate, Nature, 509, 76–80, https://doi.org/10.1038/nature13196, 2014.
Monteagudo, M. M., Lynch-Stieglitz, J., Marchitto, T. M., and Schmidt, M. W.: Central Equatorial Pacific Cooling During the Last Glacial Maximum, Geophysical Research Letters, 48, e2020GL088 592, https://doi.org/10.1029/2020GL088592, 2021.
Moros, M., De Deckker, P., Jansen, E., Perner, K., and Telford, R. J.: Holocene climate variability in the Southern Ocean recorded in a deep- sea sediment core off South Australia, Quaternary Science Reviews, 28, 1932–1940, https://doi.org/10.1016/j.quascirev.2009.04.007, 2009.
Mulitza, S.: Spätquartäre Variationen der oberflächennahen Hydrographie im westlichen äquatorialen Atlantik., PhD thesis, Berichte aus dem Fachbereich Geowissenschaften der Universität Bremen, 57, 95 pp., 1994.
Mulitza, S.: Globigerinoides ruber (white) isotopes of sediment core GeoB2109-1, PANGAEA, [data set], https://doi.org/10.1594/ PANGAEA.713179, 2009.
Mulitza, S., Arz, H., von Mücke, S. K., Moss, C., Niebler, H.-S., Pätzold, J., and Segl, M.: The South Atlantic Carbon Isotope record of planktic foraminifera, in: Use of proxies in Paleoceanography: Examples from the South Atlantic, edited by Fischer, G. and Wefer, G., pp. 427–445, Springer Verlag, Berlin, Heidelberg, Germany, https://doi.org/10.1007/978-3-642-58646-0_17, 1999.
Mulitza, S., Bickert, T., Bostock, H. C., Chiessi, C. M., Donner, B., Govin, A., Harada, N., Huang, E., Johnstone, H., Kuhnert, H., Langner, M., Lamy, F., Lembke-Jene, L., Lisiecki, L., Lynch-Stieglitz, J., Max, L., Mohtadi, M., Mollenhauer, G., Muglia, J., Nürnberg, D., Paul, A., Rühlemann, C., Repschläger, J., Saraswat, R., Schmittner, A., Sikes, E. L., Spielhagen, R. F., and Tiedemann, R.: …
Naik, S. S. and Naidu, P. D.: Carbonate preservation during the ‘mystery interval’ in the northern Indian Ocean, Geochemical Journal, 50, 357–362, https://doi.org/10.2343/geochemj.2.0420, 2016.
Parker, A. O., Schmidt, M. W., Jobe, Z. R., and Slowey, N. C.: A new perspective on West African hydroclimate during the last deglaciation, Earth and Planetary Science Letters, 449, 79–88, https://doi.org/10.1016/j.epsl.2016.05.038, 2016.
Patrick, A. and Thunell, R. C.: Tropical Pacific sea surface temperatures and upper water column thermal structure during the Last Glacial Maximum, Paleoceanography, 12, 649–657, https://doi.org/10.1029/97PA01553, 1997.
Paul, A., Reimer, J. J. G., Fürstenau, J., Kinkel, H., and Betzler, C.: Relationship between Late Pleistocene sea-level variations, carbonate platform morphology and aragonite production (Maldives, Indian Ocean), Sedimentology, 59, 1640–1658, https://doi.org/10.1111/j.1365- 3091.2011.01319.x, 2012.
Portilho-Ramos, R. C., Cruz, A. P. S., Barbosa, C. F., Rathburn, A. E., Mulitza, S., Venancio, I. M., Schwenk, T., Rühlemann, C., Vidal, L., Chiessi, C. M., and Silveira, C. S.: Methane release from the southern Brazilian margin during the last glacial, Scientific Reports, 8, 5948, https://doi.org/10.1038/s41598-018-24420-0, 2018.
Raza, T., Ahmad, S. M., Sahoo, M., Banerjee, B., Bal, I., Dash, S., Suseela, G., and Mukherjee, I.: Hydrographic changes in the southern Bay of Bengal during the last ⇠65,000 y inferred from carbon and oxygen isotopes of foraminiferal fossil shells, Quaternary International, 333, 77–85, https://doi.org/10.1016/j.quaint.2014.02.010, 2014.
Richter, T.: Sedimentary fluxes at the Mid-Atlantic Ridge: sediment sources, accumulation rates, and geochemical characterisation, PhD thesis, GEOMAR-Report, 73, GEOMAR Research Center for Marine Geosciences, Christian-Albrechts-Universität in Kiel, 173 pp., Kiel, https://doi.org/10.3289/GEOMAR_REP_73_1998, 1998.
Romahn, S.: Western Indian Ocean circulation and climate variability on different time scales: a study based on stable oxygen and car- bon isotopes, benthic foraminiferal assemblages and Mg/Ca paleothermometry, PhD thesis, Fachbereich Geowissenschaften, Universität Bremen, 95 pp., 2014.
Romahn, S., Mackensen, A., Groeneveld, J., and Pätzold, J.: Deglacial intermediate water reorganization: new evidence from the Indian Ocean, Climate of the Past, 10, 293–303, https://doi.org/10.5194/cp-10-293-2014, 2014.
Rühlemann, C., Frank, M., Hale, W., Mangini, A., Mulitza, S., Müller, P., and Wefer, G.: Late Quaternary productivity changes in the western equatorial Atlantic: Evidence from 230Th-normalized carbonate and organic carbon accumulation rates, Marine Geology, 135, 127–152, https://doi.org/10.1016/S0025-3227(96)00048-5, 1996.
Sarnthein, M., Winn, K., Duplessy, J.-C., and Fontugne, M. R.: Global variations of surface ocean productivity in low and mid lati- tudes: Influence on CO2 reservoirs of the deep ocean and atmosphere during the last 21,000 years, Paleoceanography, 3, 361–399, https://doi.org/10.1029/PA003i003p00361, 1988.
Sarnthein, M., Winn, K., Jung, S. J. A., Duplessy, J. C., Labeyrie, L., Erlenkeuser, H., and Ganssen, G.: Changes in East Atlantic deepwater circulation over the last 30,000 years: eight time slice reconstruction, Paleoceanography, 99, 209–268, https://doi.org/10.1029/93PA03301, 1994.
Schefuß, E., Schouten, S., and Schneider, R. R.: Climatic controls on central African hydrology during the past 20,000 years, Nature, 437, 1003–1006, https://doi.org/10.1038/nature03945, 2005.
Schneider, R.: Spätquartäre Produktivitätsänderungen im östlichen Angola-Becken: Reaktion auf Variationen im Passat-Monsun-Windsystem und in der Advektion des Benguela-Küstenstroms, PhD thesis, Berichte aus dem Fachbereich Geowissenschaften der Universität Bremen, 21, 198 pp., Bremen, 1991.
Shackleton, N., Le, J., Mix, A., and Hall, M.: Carbon isotope records from pacific surface waters and atmospheric carbon dioxide, Quaternary Science Reviews, 11, 387–400, https://doi.org/10.1016/0277-3791(92)90021-Y, 1992.
Sirocko, F.: Zur Akkumulation von Staubsedimenten im nördlichen Indischen Ozean, Anzeiger der Klimageschichte Arabiens und Indiens: = Accumulation of eolian sediments in the northern Indian Ocean, record of the climatic history of Arabia and India, PhD thesis, Geolog.- Paläontolog. Inst. u. Museum, Christian-Albrechts-Univity, Kiel, Berichte. 27, 185 pp., 1989.
Sirocko, F., Garbe-Schönberg, D., and Devey, C.: Processes controlling trace element geochemistry of Arabian Sea sediments during the last 25,000 years, Global and Planetary Change, 26, 217–303, https://doi.org/10.1016/S0921-8181(00)00046-1, 2000.
Slowey, N. C.: The modern and glacial thermoclines along the Bahama Banks, PhD thesis, Massachusetts Institute of Technology and Woods Hole Oceanographic Institution, 1990.
Slowey, N. C. and Curry, W. B.: Enhanced ventilation of the North Atlantic subtropical gyre thermocline during the last glaciation, Nature, 358, 665–668, https://doi.org/10.1038/358665a0, 1992.
Spero, H. J., Mielke, K. M., Kalve, E. M., Lea, D. W., and Pak, D. K.: Multispecies approach to reconstructing eastern equatorial Pacific thermocline hydrography during the past 360 ky, Paleoceanography, 18, 1022, https://doi.org/10.1029/2002PA000814, 2003.
Stott, L., Poulsen, C., Lund, S., and Thunell, R.: Super ENSO and Global Climate Oscillations at Millennial Time Scales, Science, 297, 222–226, https://doi.org/10.1126/science.1071627, 2002.
Stott, L., Timmermann, A., and Thunell, R.: Southern hemisphere and deep-sea warming led deglacial atmospheric CO2 rise and tropical warming, Science, 318, 435–438, doi: 10.1126/science.1143 791, 2007.
Tian, J., Huang, E., and Pak, D. K.: East Asian winter monsoon variability over the last glacial cycle: Insights from a latitudinal sea-surface temperature gradient across the South China Sea, Palaeogeography, Palaeoclimatology, Palaeoecology, 292, 319–324, https://doi.org/10.1016/j.palaeo.2010.04.005, 2010.
Tierney, J. E., deMenocal, P. B., and Zander, P. D.: A climatic context for the out-of-Africa migration, Geology, 45, 1023–1026, https://doi.org/10.1130/G39457.1, 2017.
Toledo, F. A., Costa, K. B., and Pivel, M. A.: Salinity changes in the western tropical South Atlantic during the last 30 kyr, Global and Planetary Change, 57, 383–395, https://doi.org/10.1016/j.gloplacha.2007.01.001, 2007.
Vahlenkamp, M.: The Anatomy of Heinrich Event 1 — A Multiproxy Study of Centennial to Millennial Scale Climate Change off Brazil, Master thesis, Fachbereich Geowissenschaften, Universität Bremen, 2013.
Venancio, I. M., Mulitza, S., Govin, A., Santos, T. P., Lessa, D. O., Albuquerque, A. L. S., Chiessi, C. M., Tiedemann, R., Vahlenkamp, M., Bickert, T., and Schulz, M.: Millennial- to Orbital-Scale Responses of Western Equatorial Atlantic Thermocline Depth to Changes in the Trade Wind System Since the Last Interglacial, Paleoceanography and Paleoclimatology, 33, 1490–1507, https://doi.org/10.1029…
von Rad, U., Schulz, H., Riech, V., den Dulk, M., Berner, U., and Sirocko, F.: Multiple monsoon-controlled breakdown of oxygen-minimum conditions during the past 30,000 years documented in laminated sediments off Pakistan, Palaeogeography, Palaeoclimatology, Palaeoe- cology, 152, 129–161, https://doi.org/10.1016/S0031-0182(99)00042-5, 1999.
Wang, L., Sarnthein, M., Erlenkeuser, H., Grimalt, J., Grootes, P., Heilig, S., Ivanova, E., Kienast, M., Pelejero, C., and Pflaumann, U.: East Asian monsoon climate during the Late Pleistocene: high-resolution sediment records from the South China Sea, Marine Geology, 156, 245–284, https://doi.org/10.1016/S0025-3227(98)00182-0, 1999.
Wang, P., Li, Q., Tian, J., He, J., Jian, Z., Ma, W., and Dang, H.: Monsoon influence on planktic 18O records from the South China Sea, Quaternary Science Reviews, 142, 26–39, https://doi.org/10.1016/j.quascirev.2016.04.009, 2016.
Wang, Y. V., Leduc, G., Regenberg, M., Andersen, N., Larsen, T., Blanz, T., and Schneider, R. R.: Northern and southern hemisphere controls on seasonal sea surface temperatures in the Indian Ocean during the last deglaciation, Paleoceanography, 28, 619–632, https://doi.org/10.1002/palo.20053, 2013.
Wefer, G., Berger, W. H., Bickert, T., Donner, B., Fischer, G., von Mücke, S. K., Meinecke, G., Müller, P. J., Mulitza, S., Niebler, H.- S., Pätzold, J., Schmidt, H., Schneider, R. R., and Segl, M.: Late Quaternary Surface Circulation of the South Atlantic: The Stable Isotope Record and Implications for Heat Transport and Productivity, pp. 461–502, Springer Berlin Heidelberg, Berlin, Heidelber…
Winn, K.: Density, carbon and stable isotope ratios of foraminifera from sediment core SO35-272, PANGAEA, [data set], in: Winn, Kyaw; Werner, Friedrich; Erlenkeuser, Helmut (2013): Age model and stable isotope ratios of sediment cores from the South China Sea. PAN- GAEA, https://doi.org/10.1594/PANGAEA.807876, 2013.
Zahn-Knoll, R.: Spätquatäre Entwicklung von Küstenauftrieb und Tiefenwasserzirkulation im Nordost-Atlantik. Rekonstruktion anhand stabiler Isotope kalkschaliger Foraminiferen, PhD thesis, Christian-Albrechts-Universität zu Kiel, 111 pp., 1986.
Zimmermann, R.: Spätquartäre Geschichte der Oberflächenstratifizierung im Golf von Guinea anhand des Schwerelotkernes GeoB 4905-4, Bachelor thesis, Fachbereich Geowissenschaften, Universität Bremen, 2013.

## Sheet: Meta data for G. ruber
Core	Longitude	Latitude	Water Depth	Age Min	Age Max	O-Corr	C-Corr	Species	Reference	Source (if empty = World Atlas)
Fan_17	4.45	4.81	1178	0	21	-0.1	-1.026	Globigerinoides ruber pink	Parker et al. (2016)
FR01_97-12	154.028	-23.669	990.5	1	24	0.635	-0.792	Globigerinoides ruber	Bostock et al. (2004)
GeoB10038-4	103.246	-5.938	1891	0	137	0.671	-1.383	Globigerinoides ruber sensu stricto	d18O: Mohtadi et al. (2010a, 2010b); d13C: Mulitza et al. (2022)
GeoB10053-7	112.872	-8.677	1372	0	21	0.983	-1.006	Globigerinoides ruber sensu stricto	d18O: Mohtadi et al. (2011); d13C: Mulitza et al. (2022)
GeoB10069-3	120.917	-9.595	1250	0	35	1.07	-1.168	Globigerinoides ruber sensu stricto	d18O: Gibbons et al. (2014); d13C: Mulitza et al. (2022)
GeoB1008-3	10.319	-6.582	3124	1	160	0.637	-1.381	Globigerinoides ruber pink	Schneider et al. (1991)
GeoB1016-3	11.682	-11.771	3411	0	160	0.33	-1.525	Globigerinoides ruber pink	Schneider et al. (1991)
GeoB1028-5	9.186	-20.104	2209	0	160	-0.755	-0.499	Globigerinoides ruber white	Wefer et al. (1996)
GeoB1032-3	6.037	-22.915	2505	1	160	-0.902	-0.651	Globigerinoides ruber white	Wefer et al. (1996)
GeoB1105-4	-12.428	-1.665	3225	8	149	-0.197	-1.099	Globigerinoides ruber pink	Kemle-von Mücke (1994)
GeoB1112-4	-10.75	-5.778	3125	0	160	0.32	-1.59	Globigerinoides ruber pink	Kemle-von Mücke (1994)
GeoB1113-4	-11.037	-5.745	2374	1	160	0.626	-1.216	Globigerinoides ruber white	Sarnthein et al. (1994)
GeoB12615-4	39.841	-7.138	446	1	37	0.612	-0.92	Globigerinoides ruber sensu stricto	Romahn et al. (2014)
GeoB12616-4	40.394	-6.979	1449	3	160	0.709	-0.923	Globigerinoides ruber	Romahn (2014)	Table in thesis
GeoB1523-1	-41.622	3.832	3292	1	160	0.272	-1.455	Globigerinoides ruber pink	Mulitza (1994)
GeoB16202-2	-41.592	-1.908	2248	1	23	0.111	-0.807	Globigerinoides ruber pink	Mulitza et al. (2022)
GeoB16202-2	-41.592	-1.908	2248	1	23	0.128	-0.84	Globigerinoides ruber white	Vahlenkamp (2013); Venancio et al. (2018)
GeoB2107-3	-46.452	-27.177	1048	1	74	-0.544	-1.001	Globigerinoides ruber white	d13C: Portilho-Ramos et al. (2018); d18O: Mulitza et al., (2022)
GeoB2109-1	-45.882	-27.912	2504	3	26	-0.347	-1.077	Globigerinoides ruber pink	Hale and Pflaumann (1999)
GeoB2109-1	-45.882	-27.912	2504	3	26	-0.492	-0.88	Globigerinoides ruber white	Mulitza (2009)
GeoB3104-1	-37.717	-3.667	767	3	42	0.26	-1.068	Globigerinoides ruber pink	Arz et al. (1998)
GeoB3129-1	-36.637	-4.613	830	2	14	0.26	-1.068	Globigerinoides ruber pink	Arz et al. (1999a)
GeoB3176-1	-34.442	-7.012	1385	4	25	0.12	-1.53	Globigerinoides ruber pink	Arz et al. (1999a)
GeoB3202-1	-39.978	-21.617	1090	4	66	-0.072	-1.22	Globigerinoides ruber pink	Arz et al. (1999b)
GeoB4901-8	6.72	2.678	2184	1	160	0.58	-2.061	Globigerinoides ruber pink	Adegbie (2001)
GeoB4905-4	9.39	2.5	1328	1	56	0.863	-1.994	Globigerinoides ruber pink	Adegbie et al. (2003)
GeoB6518-1	11.222	-5.588	962	0	39	0.088	-1.226	Globigerinoides ruber white	Schefuß et al. (2005)
GeoB8507-3	-18.099	19.475	2411	1	30	-0.098	-0.966	Globigerinoides ruber pink	Kohn et al. (2011)
GeoB9311-1	36.413	-21.552	1407	3	160	0.838	-1.077	Globigerinoides ruber	Dupont and Kuhlmann (2017)
GeoB9508-5	-17.948	15.498	2384	1	59	0.225	-1.407	Globigerinoides ruber pink	Mulitza et al. (2022)
GeoB9528-3	-17.663	9.166	3057	2	160	0.278	-1.713	Globigerinoides ruber pink	Gemmeke (2010)
GeoB9532-2	-14.89	8.95	317	3	28	0.102	-1.352	Globigerinoides ruber pink	Mulitza et al. (2022)
GeoB9533-2	-14.91	8.93	384	2	21	0.331	-1.296	Globigerinoides ruber pink	Mulitza et al. (2022)
GeoB9534-5	-14.94	8.9	492	3	27	0.227	-1.349	Globigerinoides ruber pink	Mulitza et al. (2022)
GEOFARKF13	-31.842	37.578	2690	5	25	-1.258	-0.478	Globigerinoides ruber white	Richter (1998)
GGC-49	139.5	7.9	2800	2	64	1.256	-1.124	Globigerinoides ruber	Leech et al. (2013)
GIK12392-1	-16.845	25.172	2575	1	144	-1.348	-0.623	Globigerinoides ruber white	Zahn-Knoll (1986)	Table in thesis
GIK16004-1	-10.647	29.978	1512	1	141	-1.821	-0.819	Globigerinoides ruber white	Sarnthein et al. (1994)
GIK16160-3	37.87	-18.24	1339	1	35	0.535	-0.837	Globigerinoides ruber	Wang et al. (2013)
GIK16771-2	-15.51	0.817	2764	0	159	-0.31	-1.37	Globigerinoides ruber white	Sarnthein et al. (1994)
GIK17940-2	117.383	20.117	1727	0	37	1.176	-0.969	Globigerinoides ruber white	Wang et al. (1999)
GIK17954-2	111.525	14.797	1520	1	160	1.472	-1.312	Globigerinoides ruber white	Wang et al. (1999)
KNR140-51GGC	-76.286	32.784	1790	7	27	-0.07	-0.23	Globigerinoides ruber	Keigwin (2004)
M125-55-7	-38.623	-20.364	1960	9	145	-0.284	-1.768	Globigerinoides ruber pink	Hou et al. (2020)
M31_3_SL3011-1	55.332	16.535	2636	15	34	0.146	-0.646	Globigerinoides ruber white	Ivanova et al. (2003)
M35003-4	-61.243	12.09	1299	0	45	0.448	-1.224	Globigerinoides ruber pink	Mulitza et al. (1999)
M5_3a-422_2	58.042	24.39	2732	1	23	0.176	-0.764	Globigerinoides ruber pink	Sirocko (1989)
M74_4_1096-1	73.246	4.262	328	1	137	0.896	-0.893	Globigerinoides ruber	Paul et al. (2012)
MD01-2378	121.788	-13.083	1783	2	160	1.087	-1.557	Globigerinoides ruber white	Holbourn et al. (2005)
MD01-2392	110.211	9.852	1966	1	160	1.605	-1.008	Globigerinoides ruber	Li et al. (2010)
MD02-2594	17.338	-34.71	2440	1	86	-0.8	-0.805	Globigerinoides ruber white	Dyez et al. (2014)
MD03-2611G	136.548	-36.73	2420	1	41	-1.763	-1.131	Globigerinoides ruber	Gingele et al. (2007), Moros et al. (2009), de Deckker et al. (2012)
MD05-2896	111.441	8.825	1657	1	33	1.94	-1.045	Globigerinoides ruber	Wang et al. (2016); Tian et al. (2010)
MD05-2901	110.743	14.375	1454	1	160	1.32	-1.098	Globigerinoides ruber	Li et al. (2009)
MD05-2904	116.253	19.455	2066	1	160	1.141	-1.094	Globigerinoides ruber	Ge et al. (2010)
MD05-2925	151.46	-9.34	1661	1	160	1.032	-0.754	Globigerinoides ruber	Lo et al. (2017)
MD76-131	72.568	15.53	1230	4	29	0.412	-0.965	Globigerinoides ruber	Duplessy (1982)
MD76-135	50.518	14.433	1895	3	24	0.343	-0.537	Globigerinoides ruber white	Sirocko (1989)
MD77-169	95.03	10.13	2360	0	160	1.124	-1.053	Globigerinoides ruber	Duplessy (1982)	PANGAEA, https://doi.org/10.1594/PANGAEA.726202
MD77-203	59.568	20.698	2442	8	25	-0.059	-0.309	Globigerinoides ruber	Sarnthein et al. (1988)
MD79-257	36.2	-20.24	1262	2	22	0.477	-0.92	Globigerinoides ruber	Duplessy et al. (1991)
MD97-2142	119.465	12.685	1557	1	160	1.931	-1.212	Globigerinoides ruber	Chen et al. (2003)
MD98-2170	125.39	-10.59	832	1	23	1.27	-1.319	Globigerinoides ruber	Stott et al. (2007)
MD98-2181	125.82	6.3	2114	0	70	0.982	-0.982	Globigerinoides ruber	Stott et al. (2007)
ML1208-13BB	-155.96	-0.22	3050	5	39	0.559	-1.14	Globigerinoides ruber white	Monteagudo et al. (2021)
ML1208-18GC	-156.66	0.59	3362	3	37	0.525	-1.214	Globigerinoides ruber white	Lynch-Stieglitz et al. (2015)
ML1208-20BB	-157.26	1.27	2850	4	160	0.734	-1.086	Globigerinoides ruber white	Monteagudo et al. (2021)
ML1208-27BB	-159.29	2.77	3331	6	72	0.779	-1.317	Globigerinoides ruber white	Monteagudo et al. (2021)
ML1208-28BB	-159.2	2.97	3153	5	81	0.895	-1.318	Globigerinoides ruber white	Lynch-Stieglitz et al. (2015)
ML1208-31BB	-160.05	4.68	2857	7	140	0.989	-1.304	Globigerinoides ruber white	Monteagudo et al. (2021)
ML1208-36BB	-161.04	6.83	2855	9	160	1.163	-1.188	Globigerinoides ruber white	Monteagudo et al. (2021)
ML1208-37BB	-161.63	7.04	2798	7	136	1.018	-1.154	Globigerinoides ruber white	Monteagudo et al. (2021)
MW9109-15GGC	158.941	-0.023	2311	4	43	1.322	-1.399	Globigerinoides ruber	Patrick and Thunell (1997)
ODP1078C	13.4	-11.921	426	1	48	0.209	-1.458	Globigerinoides ruber pink	Mulitza et al. (2022)
ODP1127	128.481	-33.357	479	1	53	-1.39	-1.27	Globigerinoides ruber	Andres (2002)
ODP658C	-18.581	20.749	2273	1	52	-0.114	-1.258	Globigerinoides ruber pink	Knaack and Sarnthein (2005); Knaack (1997)
ODP658C	-18.581	20.749	2273	1	36	-0.78	-0.721	Globigerinoides ruber white	Knaack and Sarnthein (2005); Knaack (1997)
ODP769	121.295	8.785	3656	3	154	1.466	-1.148	Globigerinoides ruber	Linsley (1996)
RC09-166	44.4	12.15	738	2	160	0.354	-0.232	Globigerinoides ruber white	Tierney et al. (2017)
RC11-238	-85.817	-1.517	2573	4	29	0.19	-1.17	Globigerinoides ruber	Koutavas and Lynch-Stieglitz (2003)
RC12-344	96.067	12.767	2140	2	22	1.188	-0.817	Globigerinoides ruber	Duplessy (1982)
RC13-140	-87.75	2.867	2246	1	27	0.931	-1.281	Globigerinoides ruber	Koutavas and Lynch-Stieglitz (2003)
RC17-176	158.8	3.8	3156	10	27	1.431	-1.273	Globigerinoides ruber	Leech et al. (2013)
RC8-102	-86.85	-1.417	2180	5	23	0.36	-1.244	Globigerinoides ruber	Koutavas and Lynch-Stieglitz (2003)
SAN-76	-42.28	-24.43	1682	3	32	-0.37	-0.479	Globigerinoides ruber white	Toledo et al. (2007)
SHAK06-5K	-10.15	37.57	2646	0	27	-1.927	-0.292	Globigerinoides ruber	Ausin et al. (2019)
SK157-15	90.25	7.8	2855	5	69	0.703	-1.258	Globigerinoides ruber	Raza et al. (2014)
SK157-16	90.3	8.767	2910	3	44	0.684	-1.195	Globigerinoides ruber	Raza et al. (2014)
SK157-20	88.7	12.15	3171	1	81	1.008	-1.324	Globigerinoides ruber	Naik and Nadu (2016)
SK218_1	82.002	14.034	3307	1	39	0.871	-1.068	Globigerinoides ruber white	d18O: Govil and Naidu (2011); d13C: Mulitza et al. (2022)
SO189-119KL	96.314	3.518	808	0	30	1.409	-1.184	Globigerinoides ruber sensu stricto	d18O: Mohtadi et al. (2014); d13C: Mulitza et al. (2022)
SO189-144KL	98.066	1.155	481	0	23	1.438	-1.069	Globigerinoides ruber sensu stricto	d18O: Mohtadi et al. (2014); d13C: Mulitza et al. (2022)
SO189-39KL	99.909	-0.79	517	0	44	1.393	-1.137	Globigerinoides ruber sensu stricto	d18O: Mohtadi et al. (2014); d13C: Mulitza et al. (2022)
SO28-11KL	60.252	5.39	3859	0	36	0.079	-1.396	Globigerinoides ruber white	Sirocko (1989)
SO35_3_272KL	177.689	-16.02	3410	5	160	0.994	-0.518	Globigerinoides ruber white	Winn (2013)
SO42-57KL	63.122	20.908	3422	4	42	-0.138	-0.492	Globigerinoides ruber white	Sirocko (1989)
SO42-74KL	57.347	14.321	3212	1	38	0.151	-0.734	Globigerinoides ruber pink	Sirocko et al. (2000)
SO90_137KA	66.496	23.121	573	3	32	-0.088	-0.784	Globigerinoides ruber white	von Rad et al. (1999)
TR163-19	-90.952	2.258	2348	1	143	0.539	-1.183	Globigerinoides ruber	Spero et al. (2003)
V19-27	-82.067	-0.467	1373	1	29	0.675	-1.291	Globigerinoides ruber	Koutavas and Lynch-Stieglitz (2003)
V19-28	-84.65	-2.367	2720	2	30	0.122	-1.098	Globigerinoides ruber	Koutavas and Lynch-Stieglitz (2003)
V21-40	-106.767	-5.517	3182	2	28	0.496	-1.445	Globigerinoides ruber	Koutavas and Lynch-Stieglitz (2003)
VM19-110	140.1	11.9	3523	3	23	1.385	-1.076	Globigerinoides ruber	Leech et al. (2013)
VM24-110	156.7	2.4	2613	5	39	1.237	-1.369	Globigerinoides ruber	Leech et al. (2013)
VM24-150	155.7	-2.2	1849	3	22	1.581	-1.089	Globigerinoides ruber	Leech et al. (2013)
VM28-227	168.7	-10.7	3634	5	28	1.489	-0.827	Globigerinoides ruber	Leech et al. (2013)
VM28-229	167.8	-8.4	3669	5	22	1.488	-1.25	Globigerinoides ruber	Leech et al. (2013)
VM28-230	166.8	-5.5	2992	7	30	1.404	-1.208	Globigerinoides ruber	Leech et al. (2013)
VM28-233	161.4	-6.3	2334	2	25	1.133	-1.426	Globigerinoides ruber	Leech et al. (2013)
VM28-234	159	-7.1	2719	1	24	1.31	-1.091	Globigerinoides ruber	Leech et al. (2013)
VM28-236	162	-3.6	2637	17	26	1.75	-1.156	Globigerinoides ruber	Leech et al. (2013)
WIND-28K	51.013	-10.154	4157	9	149	0.237	-1.248	Globigerinoides ruber	Johnstone et al. (2014)

## Sheet: Meta data for T. sacculifer
Core	Longitude	Latitude	Water Depth	Age Min	Age Max	O-Corr	C-Corr	Species	Reference	Source (if empty = World Atlas)
ERDC-093P	157.008	-2.242	1604	0	160	0.95	-1.7	Globigerinoides sacculifer	Shackleton et al. (1992)
EW9209-1JPC	-44.195	5.907	4056	4	67	-0.27	-1.74	Globigerinoides sacculifer	Curry et al. (1999)
FR01_97-12	154.028	-23.669	991	1	34	0.24	-1.06	Globigerinoides sacculifer	Bostock et al. (2004)
GeoB1112-4	-10.75	-5.778	3125	0	160	-0.47	-2.01	Globigerinoides sacculifer	Meinecke (1992)	PANGAEA, https://doi.org/10.1594/PANGAEA.54765
GeoB1503-1	-30.647	2.312	2306	9	159	0.33	-1.17	Globigerinoides sacculifer	Dürkoop et al. (1997a)
GeoB1515-1	-43.667	4.238	3129	2	160	-0.16	-1.01	Globigerinoides sacculifer trilobus	Rühlemann et al. (1996)
GeoB1523-1	-41.622	3.832	3292	1	160	0.06	-1.08	Globigerinoides sacculifer trilobus	Mulitza (1994)
GeoB16202-2	-41.592	-1.908	2248	2	22	-0.35	-1.63	Globigerinoides sacculifer trilobus	Freimueller (2013)
GeoB2109-1	-45.882	-27.912	2504	3	160	-0.63	-1.61	Globigerinoides sacculifer	Dürkoop (1998)
GeoB2125-1	-39.863	-20.823	1503	3	59	-0.59	-1.66	Globigerinoides sacculifer trilobus	Dürkoop et al. (1997b)
GeoB2202-4	-34.265	-8.198	1156	6	156	0.11	-1.03	Globigerinoides sacculifer	Dürkoop et al. (1997c)
GeoB2204-1	-34.023	-8.532	2080	2	17	-0.14	-1.19	Globigerinoides sacculifer	Dürkoop (1998)
GeoB2204-2	-34.022	-8.528	2072	6	160	-0.14	-1.19	Globigerinoides sacculifer	Dürkoop (1998)
GeoB3104-1	-37.717	-3.667	767	3	43	-0.17	-0.98	Globigerinoides sacculifer	Arz et al. (1998)
GeoB3117-1	-37.092	-4.295	800	7	34	-0.23	-1.36	Globigerinoides sacculifer	Arz et al. (1999b)
GeoB3129-1	-36.637	-4.613	830	2	14	-0.23	-1.36	Globigerinoides sacculifer	Arz et al. (1999b)
GeoB3176-1	-34.442	-7.012	1385	4	25	-0.17	-1.35	Globigerinoides sacculifer	Arz et al. (1999b)
GeoB3202-1	-39.978	-21.617	1090	4	66	-0.58	-1.32	Globigerinoides sacculifer	Arz et al. (1999a)
GeoB4901-8	6.72	2.678	2184	1	160	-0.56	-1.9	Globigerinoides sacculifer	Adegbie (2001)
GeoB4905-4	9.39	2.5	1328	1	56	-0.1	-1.9	Globigerinoides sacculifer	Zimmermann (2013)
GIK13519-1	-19.852	5.67	2862	0	160	-0.31	-1.94	Globigerinoides sacculifer	Sarnthein et al. (1984)
GIK16771-2	-15.51	0.817	2764	0	159	-0.82	-1.83	Globigerinoides sacculifer	Sarnthein et al. (1994)
KNR110-43PC	-43.65	4.717	3436	6	160	0.07	-1.88	Globigerinoides sacculifer	Curry and Crowley (1987)
KNR140-51GGC	-76.286	32.784	1790	0	28	-0.28	-1.23	Globigerinoides sacculifer	Keigwin (2004)
MD98-2181	125.82	6.3	2114	0	70	0.55	-1.75	Globigerinoides sacculifer	Stott et al. (2002)
MW9109-15GGC	158.941	-0.023	2311	4	43	1.07	-1.59	Globigerinoides sacculifer	Patrick and Thunell (1997)
MW9109-48GGC	161.003	-0.075	3397	6	73	0.85	-1.98	Globigerinoides sacculifer	Mulitza et al. (2022)
OC205-2-33GGC	-77.691	26.221	770	2	39	0.45	-1.23	Globigerinoides sacculifer	Slowey (1990); Slowey and Curry (1992)	Table in thesis
RC11-238	-85.817	-1.517	2573	4	29	-0.07	-1.82	Globigerinoides sacculifer	Koutavas and Lynch-Stieglitz (2003)
RC13-140	-87.75	2.867	2246	1	27	0.43	-1.91	Globigerinoides sacculifer	Koutavas and Lynch-Stieglitz (2003)
RC8-102	-86.85	-1.417	2180	5	23	0.27	-1.83	Globigerinoides sacculifer	Koutavas and Lynch-Stieglitz (2003)
RC9-150	114.55	-31.28	2703	0	160	-0.25	-0.61	Globigerinoides sacculifer	CLIMAP (1981)	NOAA, https://www.ncei.noaa.gov/pub/data/paleo/paleocean/climap/climap18/
TR163-19	-90.952	2.258	2348	1	143	-0.18	-1.69	Globigerinoides sacculifer	Spero et al. (2003)
V19-27	-82.067	-0.467	1373	1	29	0.37	-1.99	Globigerinoides sacculifer	Koutavas and Lynch-Stieglitz (2003)
V19-28	-84.65	-2.367	2720	2	30	0.27	-1.84	Globigerinoides sacculifer	Koutavas and Lynch-Stieglitz (2003)
V20-234	-33.03	5.317	3133	6	160	-0.15	-1.89	Globigerinoides sacculifer	Mulitza et al. (2022)
V21-29	-89.35	-1.05	712	1	28	0.55	-1.79	Globigerinoides sacculifer	Koutavas and Lynch-Stieglitz (2003)
V21-30	-89.683	-1.217	617	2	30	0.31	-1.75	Globigerinoides sacculifer	Koutavas and Lynch-Stieglitz (2003)
V21-40	-106.767	-5.517	3182	3	28	0.12	-2.18	Globigerinoides sacculifer	Koutavas and Lynch-Stieglitz (2003)
V24-109	158.8	0.433	2367	0	160	0.73	-1.66	Globigerinoides sacculifer	Shackleton et al. (1992)
